# Supplementary material for: Long-term Mortality and End-Stage Renal Disease in a Type 1 Diabetes Population Diagnosed at Age 15–29 Years in Norway
Source: Oxford University Press journal article supplement (doi:10.2337/dc16-1213), 2016-10-21

# SUPPLEMENTARY DATA

**Supplementary Table S1.** Cause-specific mortality rates (per 1,000 person-years) and HRs in 719 individuals with type 1 diabetes diagnosed between 15 and 29 years of age.

|                                           | Total     |                             | Men        |                             | Women        |                             | Female vs male              |        |
|-------------------------------------------|-----------|-----------------------------|------------|-----------------------------|--------------|-----------------------------|-----------------------------|--------|
| Causes of death                           | n         | Mortality rates<br>(95% CI) | n          | Mortality rates<br>(95% CI) | n            | Mortality rates<br>(95% CI) | HR <sup>†</sup><br>(95% CI) | p      |
| Total deaths                              | 148       | 6.96<br>(5.90-8.15)         | 106 (71.6) | 8.90<br>(7.32-10.72)        | 42<br>(28.4) | 1.58<br>(1.04-2.32)         | 0.50<br>(0.35-0.72)         | <0.001 |
| Acute complications                       | 30 (20.3) | 1.41<br>(0.98-2.01)         | 22 (20.8)  | 1.85<br>(1.22-2.80)         | 8 (19.0)     | 0.86<br>(0.43-1.71)         | 0.47<br>(0.21-1.02)         | 0.06   |
| <i>Diabetic ketoacidosis</i>              | 20 (13.5) | 0.94<br>(0.69-1.45)         | 13 (12.3)  | 1.09<br>(0.63-1.88)         | 7 (16.6)     | 0.75<br>(0.36-1.57)         |                             |        |
| <i>Hypoglycemia</i>                       | 10 (6.8)  | 0.47<br>(0.25-0.87)         | 9 (8.5)    | 0.76<br>(0.39-1.45)         | 1 (2.4)      | 0.11<br>(0.02-0.76)         |                             |        |
| Chronic complications                     | 47 (31.8) | 2.21<br>(1.66-2.94)         | 31 (29.2)  | 2.60<br>(1.83-3.70)         | 16<br>(38.1) | 1.71<br>(1.05-2.79)         | 0.64<br>(0.35-1.16)         | 0.14   |
| <i>Ischemic heart disease</i>             | 30 (20.3) | 1.41<br>(0.98-2.01)         | 20 (18.9)  | 1.68<br>(1.08-2.60)         | 10<br>(23.8) | 1.07<br>(0.58-1.99)         |                             |        |
| <i>Cerebrovascular disease</i>            | 5 (3.4)   | 0.23<br>(0.09-0.56)         | 4 (3.8)    |                             | 1 (2.4)      |                             |                             |        |
| <i>Renal death</i>                        | 3 (2.0)   | 0.14<br>(0.05-0.43)         | 2 (1.9)    |                             | 1 (2.4)      |                             |                             |        |
| <i>Other cardiovascular complications</i> | 9 (6.1)   | 0.42<br>(0.22-0.81)         | 5 (4.7)    |                             | 4 (9.5)      |                             |                             |        |
| Violent death                             | 29 (19.6) | 1.36<br>(0.94-1.96)         | 28 (26.4)  | 2.35<br>(1.62-3.40)         | 1 (2.4)      | 0.10<br>(0.02-0.76)         | 0.05<br>(0.01-0.35)         | 0.003  |
| Cancer                                    | 19 (12.8) | 0.89<br>(0.57-1.40)         | 10 (9.4)   | 0.84<br>(0.45-1.56)         | 9 (21.4)     | 0.96<br>(0.50-1.85)         |                             |        |
| Other causes                              | 16 (10.8) | 0.75<br>(0.46-1.23)         | 10 (9.4)   |                             | 6 (14.3)     |                             |                             |        |
| Sudden, unexplained death                 | 5 (3.4)   | 0.24<br>(0.10-0.57)         | 3 (2.8)    |                             | 2 (4.8)      |                             |                             |        |
| Missing*                                  | 2 (1.4)   |                             | 2 (1.9)    |                             | 0            |                             |                             |        |

\*Missing information in the Norwegian Cause of Death Registry

†adjusted for age at diagnosis

## SUPPLEMENTARY DATA

**Supplementary Figure S1.** Cumulative mortality in 719 individuals with type 1 diabetes diagnosed between 15 and 29 years of age, with 95% CI (a) and by sex,  $p < 0.001$ . Dashed line, men; solid line, women (b).

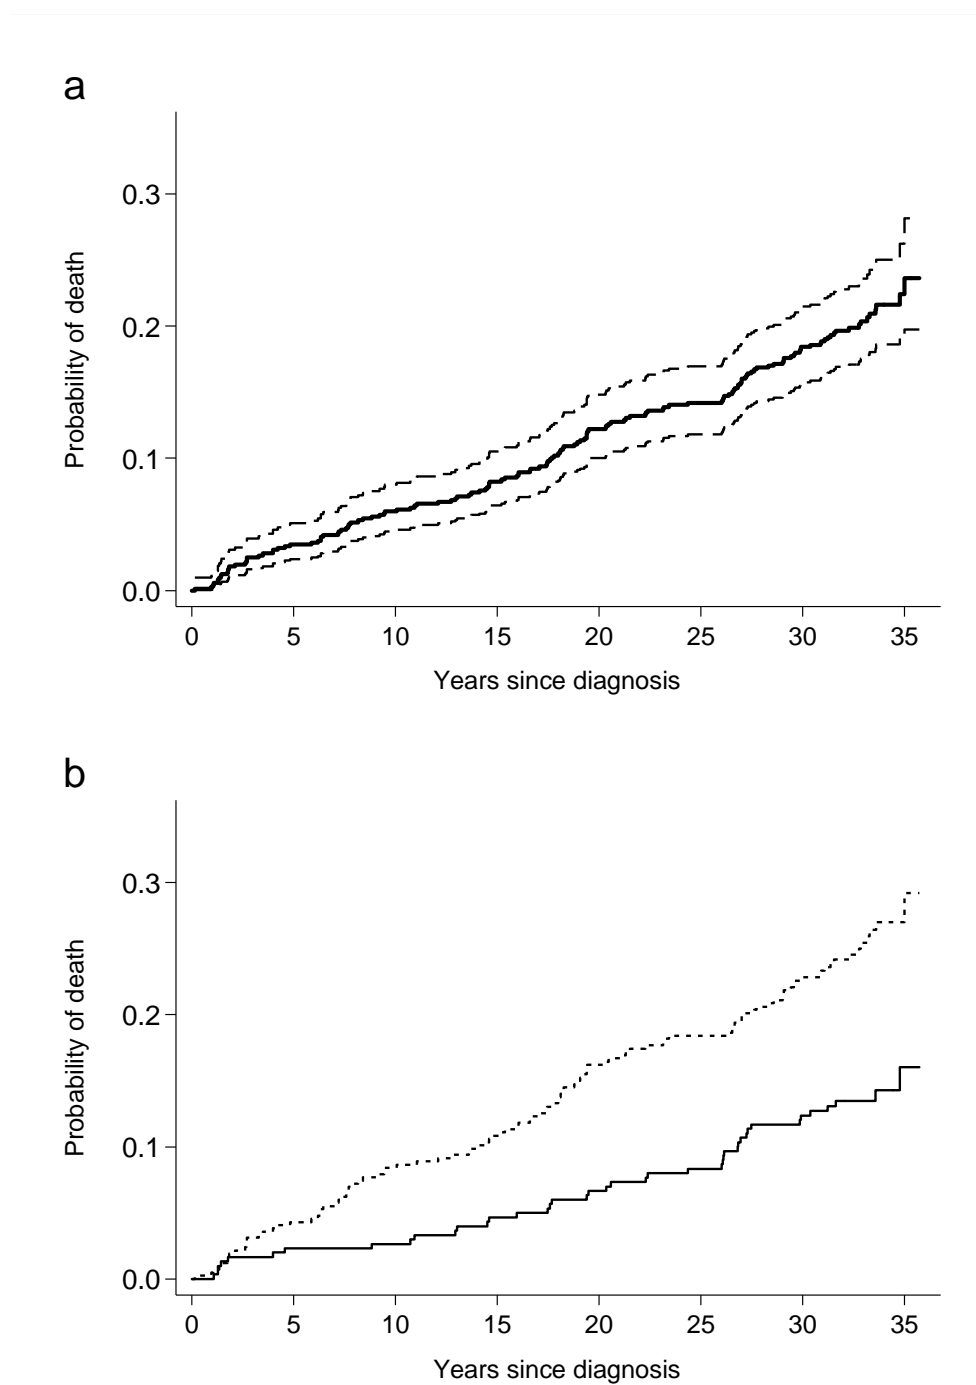

## SUPPLEMENTARY DATA

**Supplementary Figure S2.** Standardized mortality ratios by 10-year attained age groups in 719 individuals with type 1 diabetes diagnosed between 15 and 29 years of age.

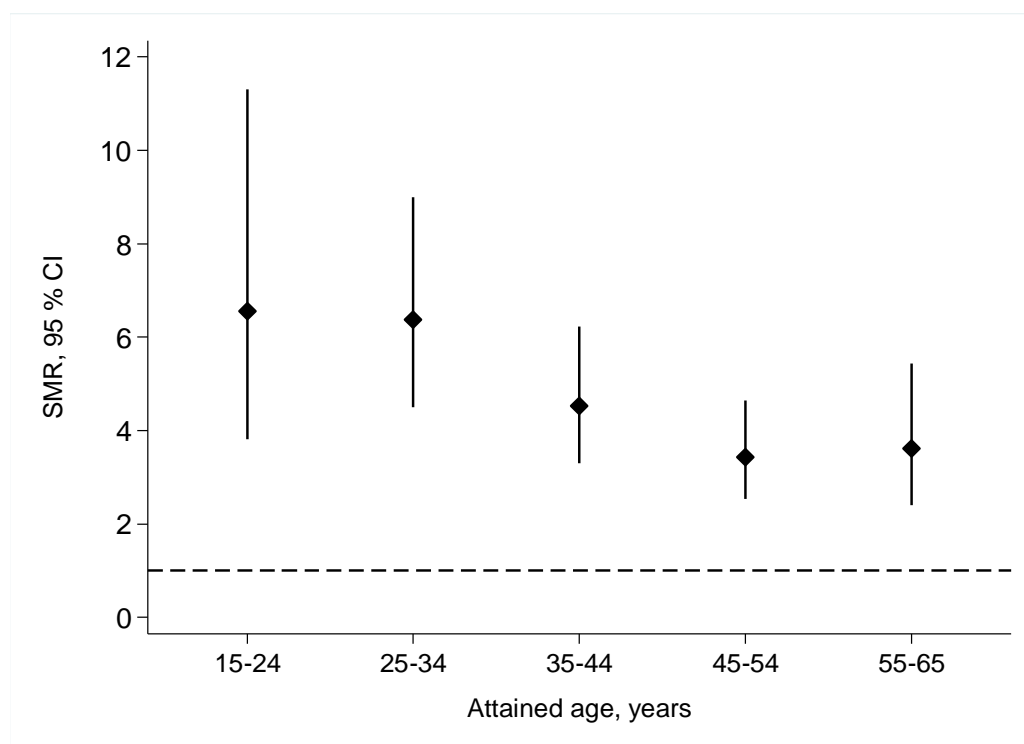

SUPPLEMENTARY DATA

**Supplementary Figure S3.** Most common underlying cause of death in 146 individuals with type 1 diabetes, diagnosed between age 15 and 29 years, followed for 30 years. Data are presented by age at death.

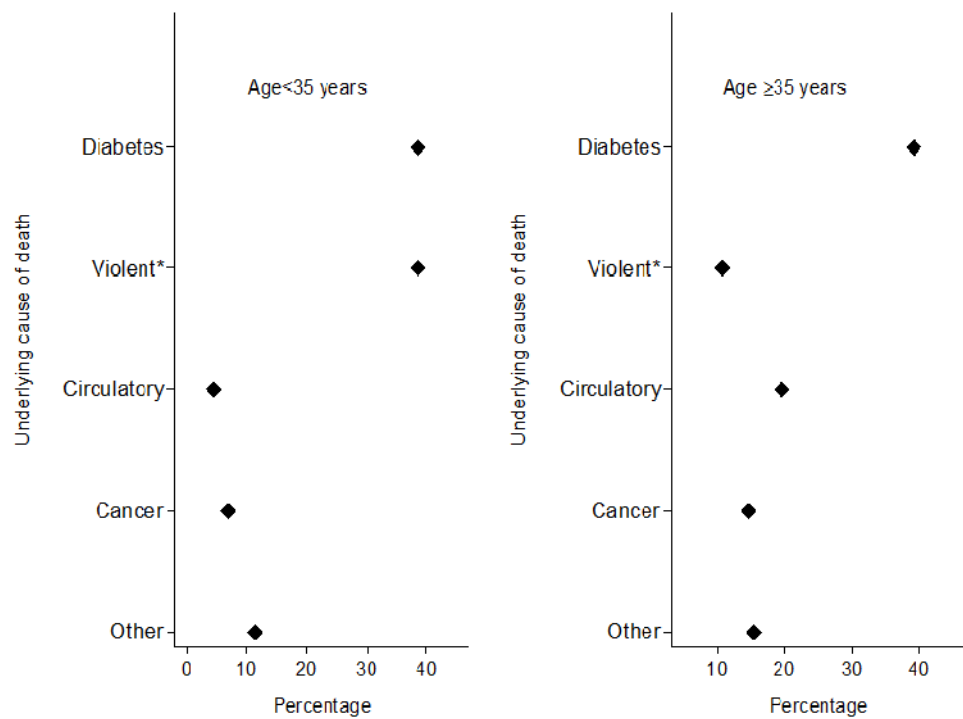

\*including accidents, intoxications and suicide

SUPPLEMENTARY DATA

**Supplementary Figure S4.** Cumulative mortality with 95% CI in 33 individuals with type 1 diabetes and ESRD followed until 10 years after diagnosis of ESRD. Type 1 diabetes was diagnosed at age 15-29 years.

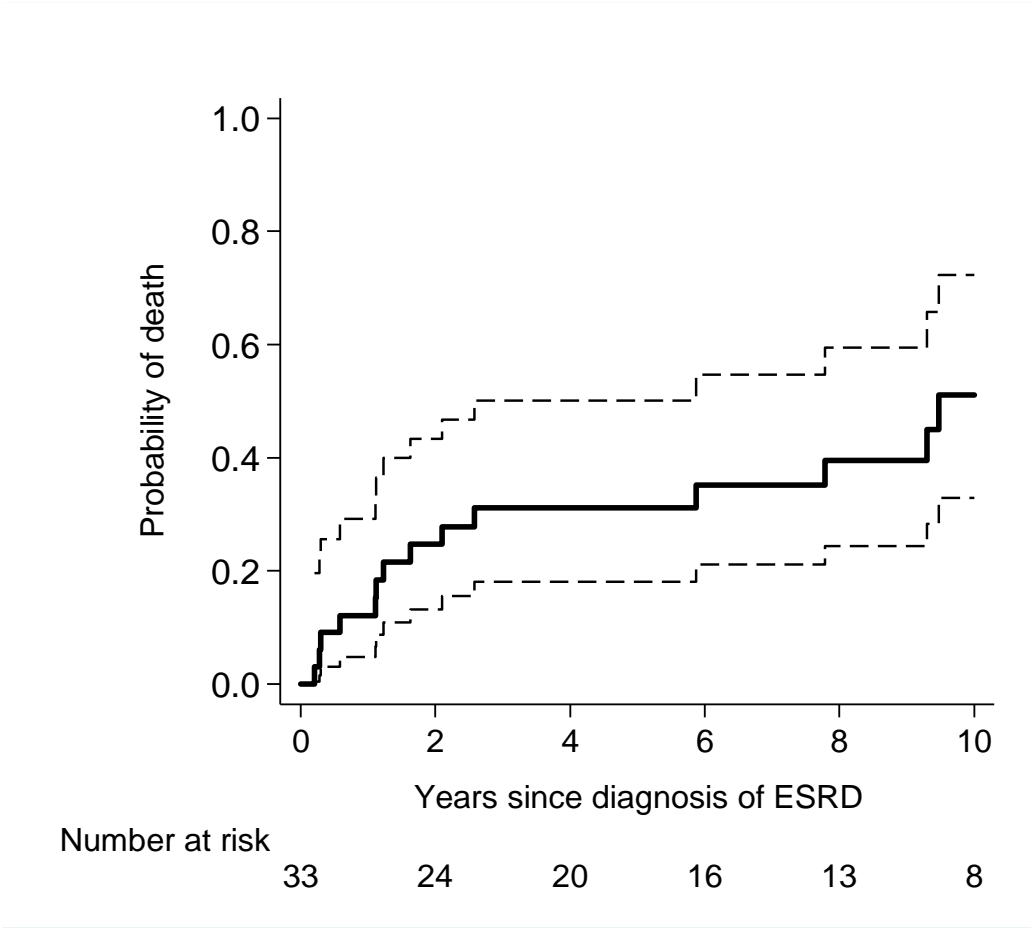

Supplement: dc161213supplementarydata.pdf [file dc161213supplementarydata.pdf]
